# Supplementary material
Source: PubMed Central journal article supplement (PMC3594397)
Supplement: NIHMS435206-supplement-1.pdf [file NIHMS435206-supplement-1.pdf]

|  | <b>Vδ6.3</b>          | P/N | <b>Dδ1</b> | P/N | <b>Dδ2</b>       | P/N | <b>Jδ1</b>     |
|--|-----------------------|-----|------------|-----|------------------|-----|----------------|
|  | GCT CTC TGG GAG CTG G |     | ATGGCATAT  |     | ATCGGAGGGATACGAG |     | CT ACC GAC AAA |
|  | A L W E L V           |     |            |     | I G G I R A      |     | T D K          |

**WT liver V6<sup>+</sup> cells (n=17)**

|       |     |                    |    |  |                  |  |                |
|-------|-----|--------------------|----|--|------------------|--|----------------|
| fetal | (9) | GCT CTC TGG GAG C  | AT |  | ATCGGAGGGATACGAG |  | CT ACC GAC AAA |
|       |     | A L W E H          |    |  | I G G I R A      |  | T D K          |
|       | (1) | GCT CTC TGG GAG C  | AT |  | ATCGGAGGGATACGAG |  | CT ACC GAC     |
|       |     | A L W E H          |    |  | I G G I R A      |  | T D            |
|       | (6) | GCT CTC TGG GAG CT | T  |  | ATCGGAGGGATACGAG |  | CT ACC GAC AAA |
|       |     | A L W E L          |    |  | I G G I R A      |  | T D K          |
|       | (1) | GCT CTC TGG GAG CT | T  |  | ATCGGAGGGATACGAG |  | CT             |
|       |     | A L W E L          |    |  | I G G I R A      |  |                |

**Itk<sup>-/-</sup> liver V6<sup>+</sup> cells (n=14)**

|       |             |                       |          |       |                  |                |                |             |
|-------|-------------|-----------------------|----------|-------|------------------|----------------|----------------|-------------|
| fetal | (4)         | GCT CTC TGG GAG C     | AT       |       | ATCGGAGGGATACGAG |                | CT ACC GAC AAA |             |
|       |             | A L W E H             |          |       | I G G I R A      |                | T D K          |             |
|       | (3)         | GCT CTC TGG GAG CTG G |          |       | TGGGAGGGATACGAG  |                | CT ACC GAC AAA |             |
|       |             | A L W E L V           |          |       | G G I R A        |                | T D K          |             |
|       | (3)         | GCT CTC TGG GAG CTG G | C        |       | CGGAGGGATACGAG   |                | CT ACC GAC AAA |             |
|       |             | A L W E L A           |          |       | G G I R A        |                | T D            |             |
| adult | (4)         | GCT CTC TGG GAG CTG G | TCCCATAT | ATGGC | CCTTT            | ATCGGAGGGATACG | GCA            | ACC GAC AAA |
|       | A L W E L V | P Y                   | M A      | L Y   | R R D T          | A              | T D K          |             |

**WT-4Get thymocyte stage 1 (CD122<sup>-</sup>GFP<sup>+</sup>; n=28)**

|       |                    |                       |      |      |                  |                  |                |                |
|-------|--------------------|-----------------------|------|------|------------------|------------------|----------------|----------------|
| fetal | (4)                | GCT CTC TGG GAG C     | AT   |      | ATCGGAGGGATACGAG |                  | CT ACC GAC AAA |                |
|       |                    | A L W E H             |      |      | I G G I R A      |                  | T D K          |                |
|       | (5)                | GCT CTC TGG GAG CTG G |      |      | TGGGAGGGATACGAG  |                  | CT ACC GAC AAA |                |
|       |                    | A L W E L V           |      |      | G G I R A        |                  | T D K          |                |
|       | (2)                | GCT CTC TGG GAG CTG G |      |      | TGGGAGGGATACGAG  |                  | CT             |                |
|       |                    | A L W E L V           |      |      | G G I R A        |                  |                |                |
|       | (5)                | GCT CTC TGG GAG CTG G | C    |      | CGGAGGGATACGAG   |                  | CT ACC GAC AAA |                |
|       |                    | A L W E L A           |      |      | G G I R A        |                  | T D K          |                |
| adult | (2)                | GCT CTC TGG G         | GCCT | A    | ATCGGAGG         | AATAT            | CT ACC GAC AAA |                |
|       |                    | A L W G               | L    |      | I G G            | I S              | T D K          |                |
|       | (1)                | GCT CTC TGG GAG CTG G | T    | TGGC | TT               | TCCAG            | CT ACC GAC AAA |                |
|       |                    | A L W E L V           |      | G    | L                | E G              | P A            | T D K          |
|       | (1)                | GCT CTC TGG GAG CTG G | CCT  |      | CGGAGG           | CCCA             | ACC GAC AAA    |                |
|       |                    | A L W E L A           | P    |      | E G              | P                | T D K          |                |
|       | (1)                | GCT CTC TGG GAG CTG G | AG   | GG   | GGAT             | ATCGGAGGGATAC    | CTG            | CT ACC GAC AAA |
|       |                    | A L W E L E           |      | G    | D                | I G G I P        | A              | T D K          |
|       | (1)                | GCT CTC TGG GAG CTG   | AAG  | GG   | AGAT             | ATCGGAGGGAT      | TCCCG          | CT ACC GAC AAA |
|       |                    | A L W E L             | K    | G    | D                | I G G I          | P A            | T D K          |
|       | (1)                | GCT CTC TGG GAG CT    | C    | CAT  |                  | ATCGGAGGGATACGAG | CTT            | CC GAC AAA     |
|       |                    | A L W E L             |      | H    |                  | I G G I R A      | S              | D K            |
|       | (1)                | GCT CTC TGG GAG C     | CAG  | ATAT | C                | GGG              | G              | CT ACC GAC AAA |
|       |                    | A L W E P             | D    | I    |                  | G                | A              | T D K          |
| (1)   | GCT CTC TGG GAG C  | CCT                   | AT   |      | ATCGGAGGGATA     | GTCTTCT          | CT ACC GAC AAA |                |
|       | A L W E P          | Y                     |      |      | I G G I          | V F S            | T D K          |                |
| (1)   | GCT CTC TGG GAG    |                       | TGGC |      | CGGAGGGATACGAG   | CTTAGG           | ACC GAC AAA    |                |
|       | A L W E            |                       | W P  |      | E G Y E          | L R              | T D K          |                |
| (1)   | GCT CTC TGG GAG CT | TGAT                  |      |      | ATCGGAGGGATACG   | TCCCG            | CT ACC GAC AAA |                |
|       | A L W E L          | D                     |      |      | I G G I R        | P A              | T D K          |                |
| (1)   | GCT CTC TGG GAG CT | T                     |      |      | ATCGGAGGGATACG   | GGGTCCG          | CT ACC GAC AAA |                |
|       | A L W E L          |                       |      |      | I G G I R        | G S A            | T D K          |                |

**WT-4Get thymocyte stage 2 (CD122<sup>+</sup>GFP<sup>+</sup>; n=25)**

|       |     |                       |      |  |                  |      |                |
|-------|-----|-----------------------|------|--|------------------|------|----------------|
| fetal | (1) | GCT CTC TGG GAG C     | GT   |  | ATCGGAGGGATACGAG |      | CT             |
|       |     | A L W E R             |      |  | I G G I R A      |      |                |
|       | (1) | GCT CTC TGG GAG C     | AG   |  | ATCGGAGGGATACGAG |      | CT ACC GAC AAA |
|       |     | A L W E Q             |      |  | I G G I R A      |      | T D K          |
|       | (2) | GCT CTC TGG GAG CTG G |      |  | TGGGAGGGATACGAG  |      | CT ACC GAC AAA |
|       |     | A L W E L V           |      |  | G G I R A        |      | T D K          |
| adult | (1) | GCT CTC TGG GAG C     | AT   |  | ATCGGAGGGATACG   | GG   | CT ACC GAC AAA |
|       |     | A L W E H             |      |  | I G G I R        | A    | T D K          |
|       | (1) | GCT CTC TGG GAG CTG G | C    |  | CGGAGGGATA       | ACGG | CT ACC GAC AAA |
|       |     | A L W E L A           |      |  | G G I            | T A  | T D K          |
|       | (1) | GCT CTC TGG GAG       | TTCG |  | AGGGATACGAG      | CTTG | CC GAC AAA     |
|       |     | A L W E               | F E  |  | G Y E            | L A  | D K            |

|       |                       |                       |            |           |                  |                  |                |                |
|-------|-----------------------|-----------------------|------------|-----------|------------------|------------------|----------------|----------------|
| adult | (1)                   | GCT CTC TGG GAG C     | AGT        | ATGGCA    | GAAT             | ATCGGAGGGAT      |                | CC GAC AAA     |
|       |                       | A L W E Q             | Y          | G R       | I                | S E G S          |                | D K            |
|       | (1)                   | GCT CTC TGG GAG C     |            | ATGGCATAT | CGTCT            | ATCGGAGGGATACGAG |                | CT ACC GAC AAA |
|       |                       | A L W E H             |            | G I S     | S                | I G G I R A      |                | T D K          |
|       | (1)                   | GCT CTC TGG GAG C     | ACAT       | ATGGCAT   |                  | ATCGGAGGGATACGA  |                | ACC GAC AAA    |
|       |                       | A L W E H             | I          | W H       |                  | I G G I R        |                | T D K          |
|       | (1)                   | GCT CTC TGG GAG C     |            |           | ACCTT            | ATCGGAGGGATACGAG | CCCCGTA        | T ACC GAC AAA  |
|       |                       | A L W E H             |            |           | L                | I G G I R A      | P Y            | T D K          |
|       | (1)                   | GCT CTC TGG GAG C     | AT         | ATGGCATAT | GA               | CGGAGGGATACGAG   |                | CC GAC AAA     |
|       |                       | A L W E H             |            | M A Y     | D                | G G I R A        |                | D K            |
|       | (1)                   | GCT CTC TGG GAG CTG G | ACGGA      | ATGGCATAT | T                | GGATACGAG        |                | CT ACC GAC AAA |
|       |                       | A L W E L D           | G          | M A Y     | W                | I R A            |                | T D K          |
|       | (1)                   | GCT CTC TGG GAG CTG G | CGAGAGGCAT |           |                  | ATCGGAGGGATACG   | GGGGAT         | CC GAC AAA     |
|       |                       | A L W E L A           | R G I      |           |                  | S E G Y G        | G S            | D K            |
|       | (1)                   | GCT CTC TGG GAG CTG G |            |           | AGGGA            | CGGAGGGATACG     | C              | CC GAC AAA     |
|       |                       | A L W E L E           |            |           | G                | R R D T          | P              | D K            |
|       | (1)                   | GCT CTC TGG GAG C     | CTCAT      |           |                  | ATCGGAGGGATACGAG | CTC            | CC GAC AAA     |
|       |                       | A L W E P             | H          |           |                  | I G G I R A      | P              | D K            |
| (1)   | GCT CTC TGG GAG C     | CTCAT                 |            |           | ATCGGAGGGATAC    | CCTCCC           | CC GAC AAA     |                |
|       | A L W E P             | H                     |            |           | I G G I P        | S P              | D K            |                |
| (2)   | GCT CTC TGG GAG CTG G | GGGA                  | GG         | T         | ATCGGAG          | CC               | ACC GAC AAA    |                |
|       | A L W E L G           | G                     | G          |           | I G A            |                  | T D K          |                |
| (2)   | GCT CTC TGG GAG CTG G |                       |            | GGG       | CGGAGGGATACG     | GGG              | CT ACC GAC AAA |                |
|       | A L W E L G           |                       |            | A         | E G Y G          | A                | T D K          |                |
| (1)   | GCT CTC TGG GAG CTG G | CGGCCCT               |            |           | ATA              | TGGCCCTC         | CT ACC GAC AAA |                |
|       | A L W E L A           | A L                   |            |           | Y                | G P P            | T D K          |                |
| (1)   | GCT CTC TGG GAG CTG G | GG                    |            |           | GGAGGGATACGAG    | CCC              | CT ACC GAC AAA |                |
|       | A L W E L G           |                       |            |           | G G I R A        | P                | T D K          |                |
| (1)   | GCT CTC TGG GAG CT    | AGGG                  | GGC        | TTCTT     | ATCGGAGGGATAC    | C                | CC GAC AAA     |                |
|       | A L W E L             | G                     | G          | F L       | S E G Y          | P                | D K            |                |
| (1)   | GCT CTC TGG GAG CT    | C                     | TAT        |           | ATCGGAGGGATACGAG | CTC              | CC GAC AAA     |                |
|       | A L W E L             |                       | Y          |           | I G G I R A      | P                | D K            |                |

**WT-4Get thymocyte stage 3 (CD122<sup>+</sup>GFP<sup>-</sup>; n=22)**

|       |                       |                       |         |         |                  |                  |                |                |
|-------|-----------------------|-----------------------|---------|---------|------------------|------------------|----------------|----------------|
| fetal | (3)                   | GCT CTC TGG GAG C     | AT      |         |                  | ATCGGAGGGATACGAG |                | CT ACC GAC AAA |
|       |                       | A L W E H             |         |         |                  | I G G I R A      |                | T D K          |
| adult | (2)                   | GCT CTC TGG GAG CTG G |         |         |                  | TCGGAGGGATACGAG  |                | CT ACC GAC AAA |
|       |                       | A L W E L V           |         |         |                  | G G I R A        |                | T D K          |
|       | (1)                   | GCT CTC TGG GAG CTG G | C       |         |                  | CGGAGGGATACGA    | A              | CT ACC GAC AAA |
|       |                       | A L W E L A           |         |         |                  | G G I R          | T              | T D K          |
|       | (1)                   | GCT CTC TGG GAG CTG G |         |         |                  | GGGATA           |                | CT ACC GAC AAA |
|       |                       | A L W E L G           |         |         |                  | D T              |                | T D K          |
|       | (1)                   | GCT CTC TGG GAG       | AC      |         |                  | CGGAGGG          | GTACGGT        | CT             |
|       |                       | A L W E L             | T       |         |                  | G G              | V R S          |                |
|       | (1)                   | GCT CTC TGG GAG       | T       |         |                  | TCGG             |                | T ACC GAC AAA  |
|       |                       | A L W E               |         |         |                  | G                |                | T D K          |
|       | (1)                   | GCT CTC TGG GAG C     | CTCAT   |         |                  | ATCGGAGGGATACGAG | CTC            | CC GAC AAA     |
|       |                       | A L W E P             | H       |         |                  | I G G I R A      | P              | D K            |
|       | (1)                   | GCT CTC TGG GAG C     | C       | ATGGCA  | ACTCC            | GAGGGATACGAG     |                | CT ACC GAC AAA |
|       |                       | A L W E P             |         | W Q     | L R              | G I R A          |                | T D K          |
|       | (1)                   | GCT CTC TGG GAG CTG G | GGTTGGG | TGG     | CCCCAT           | ATCGGAGGG        | GT             | C GAC AAA      |
|       |                       | A L W E L G           | L G     | G       | P H              | I G G            | V              | D K            |
|       | (1)                   | GCT CTC TGG GAG CTG G | AG      | GG      | GGAT             | ATCGGAGGGATAC    | CTG            | CT ACC GAC AAA |
|       |                       | A L W E L E           |         | G       | D                | I G G I P        | A              | T D K          |
| (1)   | GCT CTC TGG GAG       |                       | TGG     |         | CGGAGGGATAC      | CCCTC            | CT ACC GAC AAA |                |
|       | A L W E               |                       | W       |         | R R D T          | P P              | T D K          |                |
| (1)   | GCT CTC TGG GA        | CAAT                  |         |         | ATCGGAGGGATACG   | GG               | CT ACC GA      |                |
|       | A L W D               | N                     |         |         | I G G I R        | A                | T D K          |                |
| (1)   | GCT CTC TGG GA        | CCAGGT                | ATGGC   | CCCCACC | CGGAGGGATACGAG   |                  | CT ACC GAC AAA |                |
|       | A L W D               | Q V                   | W P     | P P     | G G I R A        |                  | T D K          |                |
| (1)   | GCT CTC TGG GAG CT    | T                     |         |         | ATCGGAGGGATACGAG | CTCCCC           | CT ACC GAC AAA |                |
|       | A L W E L             |                       |         |         | I G G I R A      | P P              | T D K          |                |
| (1)   | GCT CTC TGG GAG CTG G | GG                    |         |         | GGAGGGATACGAG    | CCC              | CT ACC GAC AAA |                |
|       | A L W E L G           |                       |         |         | G G I R A        | P                | T D K          |                |
| (1)   | GCT CTC TGG GAG CTG G | CGGGG                 |         |         | CGGAGGGATA       | CCCCCG           | CT ACC GAC AAA |                |
|       | A L W E L A           | G                     |         |         | R R D T          | P A              | T D K          |                |
| (1)   | GCT CTC TGG GAG CTG   |                       | TAT     |         | ATCGGAGGG        | GTTG             | CT ACC GAC AAA |                |
|       | A L W E L             |                       | Y       |         | I G G            | V A              | T D K          |                |
| (1)   | GCT CTC TGG GAG CTG   |                       | TAT     |         | ATCGGAGGGATACGAG | CTA              | CT ACC GAC AAA |                |
|       | A L W E L             |                       | Y       |         | I G G I R A      | T                | T D K          |                |
| (1)   | GCT CTC TGG GAG CT    | CCG                   |         |         | CGGAGGGATACGAG   |                  | CT ACC GAC AAA |                |
|       | A L W E L             | R                     |         |         | G G I R A        |                  | T D K          |                |

*Itk*<sup>-/-</sup>-4Get thymocyte stage 1 (CD122<sup>-</sup>GFP<sup>+</sup>; n=25)

|       |                       |                       |          |                  |                  |                |                |
|-------|-----------------------|-----------------------|----------|------------------|------------------|----------------|----------------|
| fetal | (4)                   | GCT CTC TGG GAG C     | AT       |                  | ATCGGAGGGATACGAG |                | CT ACC GAC AAA |
|       |                       | A L W E H             |          |                  | I G G I R A      |                | T D K          |
|       | (1)                   | GCT CTC TGG GAG C     | AT       |                  | ATCGGAGGGATACGAG |                | CT ACC         |
|       |                       | A L W E H             |          |                  | I G G I R A      |                | T              |
|       | (1)                   | GCT CTC TGG GAG C     | GT       |                  | ATCGGAGGGATACGAG |                | CT ACC GAC AAA |
|       |                       | A L W E R             |          |                  | I G G I R A      |                | T D K          |
| adult | (1)                   | GCT CTC TGG GAG CTG G |          |                  | TCCGAGGGATACGAG  |                | CT ACC GAC AAA |
|       |                       | A L W E L V           |          |                  | G G I R A        |                | T D K          |
|       | (1)                   | GCT CTC TGG GAG CTG   |          |                  | ATCGGAGGGATACGAG |                | CT ACC GAC AAA |
|       |                       | A L W E L             |          |                  | I G G I R A      |                | T D K          |
|       | (2)                   | GCT CTC TGG GAG CTG G | C        |                  | CGGAGGGATACGAG   |                | CT             |
|       |                       | A L W E L A           |          |                  | G G I R A        |                |                |
|       | (1)                   | GCT CTC TGG GAG CT    | TGAT     |                  | ATCGGAGGGATACGAG |                | CT             |
|       |                       | A L W E L             | D        |                  | I G G I R A      |                |                |
|       | (2)                   | GCT CTC TGG GAG CTG G |          |                  | GGGATACG         | G              | CT ACC GAC AAA |
|       |                       | A L W E L G           |          |                  | D T              | A              | T D K          |
|       | (1)                   | GCT CTC TGG GAG CTG G | T        |                  | GGG              | TC             | CT ACC GAC AAA |
|       |                       | A L W E L V           |          |                  | G                | P              | T D K          |
|       | (1)                   | GCT CTC TGG GAG CT    | TCATCG   |                  | AGGGATACGAG      |                | CT ACC GAC AAA |
|       |                       | A L W E L             | H R      |                  | G I R A          |                | T D K          |
| (1)   | GCT CTC TGG GAG CTG G | TCCTCTA               |          | CGGAG            |                  | CT ACC GAC AAA |                |
|       | A L W E L V           | L Y                   |          | G A              |                  | T D K          |                |
| (1)   | GCT CTC TGG GAG CTG G |                       | CATAT    | ATCGGAGGGATAC    |                  | CC GAC AAA     |                |
|       | A L W E L A           |                       | Y        | I G G I P        |                  | D K            |                |
| (1)   | GCT CTC TGG GAG CTG G |                       | ATGGC    | GGATCGGGC        | A                | ACC GAC AAA    |                |
|       | A L W E L D           |                       | G        | I G A            |                  | T D K          |                |
| (1)   | GCT CTC TGG GAG CTG G | AGCCGG                | TGGCATAT | ATGTGG           | A                | ACC GAC AAA    |                |
|       | A L W E L E           | P V                   | A Y      | M W              |                  | T D K          |                |
| (2)   | GCT CTC TGG GAG       | TTCAAT                |          | CGGAGGGATACGAG   |                  | CT ACC GAC AAA |                |
|       | A L W E               | F N                   |          | R R D T R        |                  | T D K          |                |
| (1)   | GCT CTC TGG GAG       | GAAT                  |          | ATCGGAGGGGT      |                  | CT ACC GAC AAA |                |
|       | A L W E               | E Y                   |          | R R G            | G                | T D K          |                |
| (1)   | GCT CTC TGG GAG C     | CCTAT                 |          | ATCGGAGGGATA     | GTCTTCT          | CT ACC GAC AAA |                |
|       | A L W E P             | Y                     |          | I G G I          | V F S            | T D K          |                |
| (1)   | GCT CTC TGG GAG CTG   | TCAT                  | ATGGC    | ATAGGGGGATACGAG  |                  | CT ACC GAC AAA |                |
|       | A L W E L             | S Y                   | G        | I G G I R A      |                  | T D K          |                |
| (1)   | GCT CTC TGG GAG CT    |                       | ATGGCAT  | ATCGGAGGGATACGAG | AAC              | CC GAC AAA     |                |
|       | A L W E L             |                       | W H      | I G G I R E      | P                | D K            |                |

*Itk*<sup>-/-</sup>-4Get thymocyte stage 2 (CD122<sup>+</sup>GFP<sup>+</sup>; n=33)

|       |                       |                       |        |                  |                  |                |                |
|-------|-----------------------|-----------------------|--------|------------------|------------------|----------------|----------------|
| fetal | (9)                   | GCT CTC TGG GAG C     | AT     |                  | ATCGGAGGGATACGAG |                | CT ACC GAC AAA |
|       |                       | A L W E H             |        |                  | I G G I R A      |                | T D K          |
|       | (6)                   | GCT CTC TGG GAG CTG G |        |                  | TCCGAGGGATACGAG  |                | CT ACC GAC AAA |
|       | A L W E L V           |                       |        | G G I R A        |                  | T D K          |                |
| adult | (1)                   | GCT CTC TGG GAG CT    | T      |                  | ATCGGAGGGATACGAG |                | CT ACC GAC AAA |
|       |                       | A L W E L             |        |                  | I G G I R A      |                | T D K          |
|       | (1)                   | GCT CTC TGG GAG CTG   |        |                  | ATCGGAGGGATA     | TATG           | CT ACC GAC AAA |
|       |                       | A L W E L             |        |                  | I G G I Y A      |                | T D K          |
|       | (1)                   | GCT CTC TGG GAG CTG G | C      |                  | CGGAGGGATAC      | CCG            | CT ACC GAC AAA |
|       |                       | A L W E L A           |        |                  | G G I P          | A              | T D K          |
|       | (2)                   | GCT CTC TGG GAG CT    | CGC    |                  | CGGAGGGATACG     | GG             | CT ACC GAC AAA |
|       |                       | A L W E L             | A      |                  | G G I R          | A              | T D K          |
|       | (1)                   | GCT CTC TGG GAG C     | CGGAT  |                  | ATCGGAGGGATACGAG |                | CT             |
|       |                       | A L W E P D           |        |                  | I G G I R A      |                |                |
|       | (2)                   | GCT CTC TGG GAG CTG G | AT     |                  | ATCGGAGGG        | T              | CT ACC GAC AAA |
|       |                       | A L W E L D           |        |                  | I G G            | S              | T D K          |
|       | (1)                   | GCT CTC TGG GAG CTG G |        |                  | AAA GAGGGATACGAG |                | CT ACC GAC AAA |
|       |                       | A L W E L E           |        |                  | R G I R A        |                | T D K          |
|       | (1)                   | GCT CTC TGG GAG CTG G |        | AGGGGG AT        | ATCGGAGGGATACCTG |                | CT ACC GAC AAA |
|       |                       | A L W E L E           |        | G D              | I G G I P A      |                | T D K          |
|       | (2)                   | GCT CTC TGG GAG C     |        | TC CAT           | ATCGGAGGGATACGAG |                | CT GCC GAC AAA |
|       |                       | A L W E L             |        | H                | I G G I R A      |                | D K            |
| (2)   | GCT CTC TGG GAG C     |                       | TG TAT | ATCGGAGGGATACGAG |                  | CT ACC GAC AAA |                |
|       | A L W E L             |                       | Y      | I G G I R A      |                  | T D K          |                |
| (1)   | GCT CTC TGG GA        | CCAG                  | ATAT   | GGCCCCACC        |                  | CT ACC GAC AAA |                |
|       | A L W D               | Q                     | I W    | P P P            |                  | T D K          |                |
| (2)   | GCT CTC TGG GAG CTG G |                       |        | TCCCAGCC GAG     | CTCG             | CC GAC AAA     |                |
|       | A L W E L V           |                       |        | P A E            | L A              | D K            |                |
| (1)   | GCT CTC TGG GAG CT    |                       |        | CGGAGGGATACCC    | CT G             | CT ACC GCC AGA |                |
|       | A L W E L             |                       |        | G G I P F        | A                | T A R          |                |

*Itk*<sup>-/-</sup>-4Get thymocyte stage 3 (CD122<sup>+</sup>GFP<sup>-</sup>; n=18)

|       |                   |                       |     |           |                  |                  |                |                |
|-------|-------------------|-----------------------|-----|-----------|------------------|------------------|----------------|----------------|
| fetal | (8)               | GCT CTC TGG GAG C     | AT  |           | ATCGGAGGGATACGAG |                  | CT ACC GAC AAA |                |
|       |                   | A L W E H             |     |           | I G G I R A      |                  | T D K          |                |
|       | (3)               | GCT CTC TGG GAG CTG G | C   |           | CGGAGGGATACGAG   |                  | CT ACC GAC AAA |                |
|       | A L W E L A       |                       |     | G G I R A |                  | T D K            |                |                |
| adult | (1)               | GCT CTC TGG GAG       | T   |           | GGAGGGATACGAG    | CC               | CC GAC AAA     |                |
|       |                   | A L W E               | W   |           | R D T S          | P                | D K            |                |
|       | (1)               | GCT C C               | AT  |           | ATCGGAGGGATACG   | GAA              |                |                |
|       |                   | A L                   | W   |           | E L P Y          | R                |                |                |
|       | (2)               | GCT CTC TGG GAG CT    |     | CCCAT     | ATCGGAGGGATACG   | GAA              |                |                |
|       |                   | A L W E L             |     | P Y       | R R D T          | E                |                |                |
|       | (1)               | GCT CTC TGG GAG CT    | C   | T ATAT    | GGCCCT           | ATCGGAGGGATACGAG |                | CT ACC GAC AAA |
|       |                   | A L W E L             |     | Y M       | A P              | I G G I R A      |                | T D K          |
|       | (1)               | GCT CTC TGG GAG C     | CAG | ATAT      | C                | GGG              | G              | CT ACC GAC AAA |
|       |                   | A L W E P             | D   | I         |                  | G                | A              | T D K          |
| (1)   | GCT CTC TGG GAG C |                       |     | CTTCT     | ATCGGAGGGATACGA  | AT               | C GAC AAA      |                |
|       | A L W E P         |                       |     | S         | I G G I R        | I                | D K            |                |

**Supplemental Figure 1: Sequence analysis of Vδ6-Jδ1 junctions in γδNKT cells from the liver and thymus of WT and *Itk*<sup>-/-</sup> mice.**

At the top, the germline sequences are shown. Below, the junctional regions of Vδ6 (variable region), Dδ1 and 2 (diversity region) and Jδ1 (joining region) rearrangements in liver and thymus subsets are shown. Only rearrangements resulting in in-frame junctions are included. The frequency (left) indicates the number of independent clones with each sequence. Junctions were characterized as fetal or adult based on the absence or presence of Dδ1 sequences and N-region nucleotides, respectively. In addition, sequences classified as fetal were confirmed based on comparison to those reported by Grigoriadou, et al (1) as being derived from isolated fetal V6 cells.

1. Grigoriadou, K., L. Boucontet, and P. Pereira. 2003. Most IL-4-producing gamma delta thymocytes of adult mice originate from fetal precursors. *J Immunol* 171: 2413–2420.
