# Supplementary material
Source: PubMed Central journal article supplement (PMC3594397)
Supplement: NIHMS435206-supplement-2.pdf [file NIHMS435206-supplement-2.pdf]

**Table 1: List of differentially expressed genes between WT and *Itk*<sup>-/-</sup> mature V6 thymocytes.**

List of the 195 genes that were increased or decreased in *Itk*<sup>-/-</sup> V6 thymocytes compared to WT CD24<sup>lo</sup> V6 thymocytes. Nomenclature is according to immgen.org: MatV6.WT= CD24(HSA)<sup>lo</sup> V6  $\gamma\delta$  T cells from adult WT thymus; TotalV6.*Itk*<sup>-/-</sup>, total V6  $\gamma\delta$  T cells from adult *Itk*<sup>-/-</sup> thymus, which are 95-98% CD24<sup>lo</sup>. Genes were classified as being increased if the mean expression value (MEV) was changed by 2-fold or more in pair wise comparisons with a coefficient of variation among replicates <0.5, *t*-test P-value<0.05, and MEV>120 in at least one population. For each gene, the MEV in each population is shown, along with the fold change (FC, ratio of MEVs) and *t*-test P-values. Fractional FC values indicative of decreased expression were converted to whole numbers (-1/FC). Table was sorted by the FC in ascending order.

| Name                 | MatV6.WT | Total V6. <i>Itk</i> <sup>-/-</sup> | FC Total V6. <i>Itk</i> <sup>-/-</sup> /MatV6 | t-test Total V6. <i>Itk</i> <sup>-/-</sup> /MatV6 |
|----------------------|----------|-------------------------------------|-----------------------------------------------|---------------------------------------------------|
| <i>Klra5</i>         | 606.58   | 11.54                               | -52.56                                        | 0.0010557                                         |
| <i>Klrc1</i>         | 575.27   | 28.56                               | -20.14                                        | 0.0000060                                         |
| <i>Klra6</i>         | 252.79   | 25.40                               | -9.95                                         | 0.0016892                                         |
| <i>Fcer1g</i>        | 757.52   | 76.45                               | -9.91                                         | 0.0001625                                         |
| <i>Klrc2</i>         | 314.20   | 31.90                               | -9.85                                         | 0.0024922                                         |
| <i>Lrrc6</i>         | 180.94   | 20.28                               | -8.92                                         | 0.0213632                                         |
| <i>Ccl5</i>          | 726.60   | 91.14                               | -7.97                                         | 0.0374020                                         |
| <i>Klrd1</i>         | 631.61   | 82.92                               | -7.62                                         | 0.0000130                                         |
| <i>Blk</i>           | 981.73   | 129.00                              | -7.61                                         | 0.0000098                                         |
| <i>Itga1</i>         | 191.72   | 27.91                               | -6.87                                         | 0.0011449                                         |
| <i>Klrk1</i>         | 457.32   | 66.83                               | -6.84                                         | 0.0012523                                         |
| <i>Cd244</i>         | 262.96   | 38.81                               | -6.78                                         | 0.0136412                                         |
| <i>Klrb1f</i>        | 421.95   | 62.47                               | -6.75                                         | 0.0002129                                         |
| <i>Ncr1</i>          | 142.58   | 21.59                               | -6.60                                         | 0.0106565                                         |
| <i>Jun</i>           | 545.81   | 90.48                               | -6.03                                         | 0.0276376                                         |
| <i>Ccr10</i>         | 667.55   | 115.88                              | -5.76                                         | 0.0005923                                         |
| <i>Nkg7</i>          | 1413.22  | 257.11                              | -5.50                                         | 0.0010667                                         |
| <i>Xcl1</i>          | 406.83   | 77.05                               | -5.28                                         | 0.0002279                                         |
| <i>Epha3</i>         | 142.61   | 28.22                               | -5.05                                         | 0.0343729                                         |
| <i>Myo1f</i>         | 713.09   | 143.31                              | -4.98                                         | 0.0007780                                         |
| <i>Slamf7</i>        | 356.80   | 72.42                               | -4.93                                         | 0.0000429                                         |
| <i>Styk1</i>         | 274.89   | 61.21                               | -4.49                                         | 0.0000092                                         |
| <i>Slc9a7</i>        | 174.81   | 39.14                               | -4.47                                         | 0.0002986                                         |
| <i>Sulf2</i>         | 229.41   | 51.77                               | -4.43                                         | 0.0029345                                         |
| <i>Klrb1a</i>        | 179.61   | 43.37                               | -4.14                                         | 0.0006197                                         |
| <i>Spp1</i>          | 128.78   | 31.26                               | -4.12                                         | 0.0204007                                         |
| <i>Il21</i>          | 161.52   | 39.73                               | -4.07                                         | 0.0076207                                         |
| <i>Ccr8</i>          | 760.04   | 191.17                              | -3.98                                         | 0.0002209                                         |
| <i>Klrb1b</i>        | 170.35   | 43.26                               | -3.94                                         | 0.0001500                                         |
| <i>Neur13</i>        | 257.75   | 65.94                               | -3.91                                         | 0.0002747                                         |
| <i>Ifng</i>          | 167.13   | 44.39                               | -3.77                                         | 0.0087229                                         |
| <i>Il18rap</i>       | 617.53   | 164.24                              | -3.76                                         | 0.0003828                                         |
| <i>Trps1</i>         | 135.33   | 36.80                               | -3.68                                         | 0.0001248                                         |
| <i>Klra9</i>         | 427.69   | 116.40                              | -3.67                                         | 0.0000355                                         |
| <i>A430084P05Rik</i> | 168.29   | 45.95                               | -3.66                                         | 0.0000021                                         |
| <i>Spock2</i>        | 381.08   | 105.12                              | -3.63                                         | 0.0038692                                         |
| <i>Cd7</i>           | 1718.07  | 477.23                              | -3.60                                         | 0.0000656                                         |
| <i>Stat4</i>         | 418.30   | 117.76                              | -3.55                                         | 0.0001689                                         |
| <i>Klra10</i>        | 433.45   | 124.98                              | -3.47                                         | 0.0000105                                         |

| <b>Name</b>          | <b>MatV6.WT</b> | <b>Total V6.<i>Itk</i><sup>-/-</sup></b> | <b>FC Total V6.<i>Itk</i><sup>-/-</sup>/MatV6</b> | <b>t-test Total V6.<i>Itk</i><sup>-/-</sup>/MatV6</b> |
|----------------------|-----------------|------------------------------------------|---------------------------------------------------|-------------------------------------------------------|
| <i>Vdr</i>           | 946.32          | 274.60                                   | -3.45                                             | 0.0000512                                             |
| <i>Serpina3f</i>     | 129.97          | 37.75                                    | -3.44                                             | 0.0059606                                             |
| <i>Il2rb</i>         | 2382.43         | 727.38                                   | -3.28                                             | 0.0011186                                             |
| <i>Lag3</i>          | 241.59          | 73.97                                    | -3.27                                             | 0.0001228                                             |
| <i>Ahr</i>           | 332.79          | 103.61                                   | -3.21                                             | 0.0003202                                             |
| <i>Dennd4a</i>       | 311.74          | 97.54                                    | -3.20                                             | 0.0000671                                             |
| <i>Tm6sf1</i>        | 661.31          | 211.55                                   | -3.13                                             | 0.0018068                                             |
| <i>Rnu3b1</i>        | 3624.65         | 1174.16                                  | -3.09                                             | 0.0007692                                             |
| <i>Lat2</i>          | 187.27          | 61.24                                    | -3.06                                             | 0.0003966                                             |
| <i>Snord118</i>      | 221.24          | 73.72                                    | -3.00                                             | 0.0108502                                             |
| <i>Itga4</i>         | 1075.93         | 359.05                                   | -3.00                                             | 0.0033366                                             |
| <i>Cpne7</i>         | 285.40          | 95.91                                    | -2.98                                             | 0.0019574                                             |
| <i>Arl4d</i>         | 274.38          | 94.09                                    | -2.92                                             | 0.0091520                                             |
| <i>H19</i>           | 196.42          | 67.36                                    | -2.92                                             | 0.0298369                                             |
| <i>Fasl</i>          | 178.06          | 63.37                                    | -2.81                                             | 0.0003674                                             |
| <i>Lyn</i>           | 223.84          | 79.74                                    | -2.81                                             | 0.0007855                                             |
| <i>Fam20a</i>        | 290.79          | 104.86                                   | -2.77                                             | 0.0000514                                             |
| <i>Lpar6</i>         | 1178.25         | 427.59                                   | -2.76                                             | 0.0011545                                             |
| <i>Gpr177</i>        | 194.75          | 70.93                                    | -2.75                                             | 0.0007785                                             |
| <i>Plscr1</i>        | 368.91          | 134.80                                   | -2.74                                             | 0.0014697                                             |
| <i>Cmah</i>          | 137.25          | 50.43                                    | -2.72                                             | 0.0082426                                             |
| <i>Maged1</i>        | 127.54          | 47.00                                    | -2.71                                             | 0.0023434                                             |
| <i>Ikzf3</i>         | 1046.56         | 386.01                                   | -2.71                                             | 0.0015563                                             |
| <i>Rnu3a</i>         | 1028.04         | 381.58                                   | -2.69                                             | 0.0262510                                             |
| <i>Il10ra</i>        | 130.51          | 48.55                                    | -2.69                                             | 0.0008816                                             |
| <i>F2r</i>           | 1152.13         | 429.83                                   | -2.68                                             | 0.0002247                                             |
| <i>Cx3cr1</i>        | 239.56          | 90.49                                    | -2.65                                             | 0.0084698                                             |
| <i>Scpep1</i>        | 191.05          | 73.02                                    | -2.62                                             | 0.0000780                                             |
| <i>Emp3</i>          | 750.95          | 289.51                                   | -2.59                                             | 0.0008284                                             |
| <i>Sox4</i>          | 314.39          | 122.27                                   | -2.57                                             | 0.0018326                                             |
| <i>Srgap3</i>        | 144.14          | 56.99                                    | -2.53                                             | 0.0070167                                             |
| <i>Hist1h2bg</i>     | 305.89          | 121.55                                   | -2.52                                             | 0.0004475                                             |
| <i>Slc15a2</i>       | 148.60          | 59.43                                    | -2.50                                             | 0.0010909                                             |
| <i>Tbx21</i>         | 494.19          | 197.80                                   | -2.50                                             | 0.0002969                                             |
| <i>Ly6c2</i>         | 1082.55         | 435.77                                   | -2.48                                             | 0.0003159                                             |
| <i>Gzmb</i>          | 633.86          | 255.90                                   | -2.48                                             | 0.0008128                                             |
| <i>Nr4a1</i>         | 616.33          | 248.83                                   | -2.48                                             | 0.0006337                                             |
| <i>Fosb</i>          | 168.15          | 68.19                                    | -2.47                                             | 0.0479280                                             |
| <i>Samd3</i>         | 269.60          | 110.31                                   | -2.44                                             | 0.0001055                                             |
| <i>Sccpdh</i>        | 282.67          | 116.33                                   | -2.43                                             | 0.0008605                                             |
| <i>Tmem176b</i>      | 278.99          | 114.90                                   | -2.43                                             | 0.0004377                                             |
| <i>Ikzf2</i>         | 835.81          | 344.31                                   | -2.43                                             | 0.0012362                                             |
| <i>Xdh</i>           | 390.25          | 161.42                                   | -2.42                                             | 0.0002561                                             |
| <i>2010002N04Rik</i> | 146.93          | 60.90                                    | -2.41                                             | 0.0017150                                             |
| <i>Itgae</i>         | 1372.08         | 570.78                                   | -2.40                                             | 0.0003836                                             |
| <i>A430093F15Rik</i> | 567.11          | 236.90                                   | -2.39                                             | 0.0131224                                             |
| <i>Thbs1</i>         | 236.69          | 99.04                                    | -2.39                                             | 0.0000006                                             |
| <i>Cysltr2</i>       | 138.97          | 58.38                                    | -2.38                                             | 0.0011334                                             |
| <i>I730030J21Rik</i> | 632.35          | 266.79                                   | -2.37                                             | 0.0004160                                             |
| <i>Angptl2</i>       | 263.64          | 112.22                                   | -2.35                                             | 0.0000469                                             |
| <i>Lgals1</i>        | 3635.99         | 1551.19                                  | -2.34                                             | 0.0000039                                             |

| <b>Name</b>          | <b>MatV6.WT</b> | <b>Total V6.<i>Itk</i><sup>-/-</sup></b> | <b>FC Total V6.<i>Itk</i><sup>-/-</sup>/MatV6</b> | <b>t-test Total V6.<i>Itk</i><sup>-/-</sup>/MatV6</b> |
|----------------------|-----------------|------------------------------------------|---------------------------------------------------|-------------------------------------------------------|
| <i>Trf</i>           | 510.17          | 218.57                                   | -2.33                                             | 0.0021964                                             |
| <i>Arap3</i>         | 439.53          | 189.63                                   | -2.32                                             | 0.0012150                                             |
| <i>Lass6</i>         | 144.92          | 63.03                                    | -2.30                                             | 0.0027767                                             |
| <i>Anxa6</i>         | 2366.86         | 1040.20                                  | -2.28                                             | 0.0006272                                             |
| <i>Emp1</i>          | 206.61          | 90.97                                    | -2.27                                             | 0.0011383                                             |
| <i>Nrp1</i>          | 317.76          | 140.73                                   | -2.26                                             | 0.0061755                                             |
| <i>Crim1</i>         | 411.38          | 183.74                                   | -2.24                                             | 0.0003377                                             |
| <i>Sidt1</i>         | 397.81          | 179.59                                   | -2.22                                             | 0.0023735                                             |
| <i>Spry2</i>         | 845.57          | 381.82                                   | -2.21                                             | 0.0007383                                             |
| <i>Ifngr1</i>        | 757.30          | 343.46                                   | -2.20                                             | 0.0010733                                             |
| <i>Rxra</i>          | 360.48          | 163.55                                   | -2.20                                             | 0.0048260                                             |
| <i>Ubash3b</i>       | 660.65          | 304.03                                   | -2.17                                             | 0.0000687                                             |
| <i>Ms4a4b</i>        | 685.57          | 318.49                                   | -2.15                                             | 0.0030471                                             |
| <i>Gpr114</i>        | 453.28          | 210.77                                   | -2.15                                             | 0.0090368                                             |
| <i>H2-Q6</i>         | 1405.72         | 655.29                                   | -2.15                                             | 0.0000005                                             |
| <i>Atp5d</i>         | 1706.72         | 799.55                                   | -2.13                                             | 0.0000852                                             |
| <i>Cd1d1</i>         | 357.90          | 168.53                                   | -2.12                                             | 0.0021637                                             |
| <i>Gpr52</i>         | 132.88          | 62.71                                    | -2.12                                             | 0.0216561                                             |
| <i>Maf</i>           | 795.65          | 375.64                                   | -2.12                                             | 0.0009779                                             |
| <i>Tagap</i>         | 830.13          | 392.10                                   | -2.12                                             | 0.0016755                                             |
| <i>Prkcb</i>         | 405.55          | 191.74                                   | -2.12                                             | 0.0030816                                             |
| <i>Ehd4</i>          | 266.80          | 126.90                                   | -2.10                                             | 0.0000278                                             |
| <i>Tirap</i>         | 402.75          | 193.28                                   | -2.08                                             | 0.0025335                                             |
| <i>Tns4</i>          | 146.50          | 70.36                                    | -2.08                                             | 0.0064425                                             |
| <i>Rnu1b1</i>        | 538.16          | 258.71                                   | -2.08                                             | 0.0055281                                             |
| <i>5830411N06Rik</i> | 444.51          | 214.56                                   | -2.07                                             | 0.0056417                                             |
| <i>Prex1</i>         | 879.49          | 424.61                                   | -2.07                                             | 0.0008968                                             |
| <i>Klf2</i>          | 591.97          | 291.58                                   | -2.03                                             | 0.0004505                                             |
| <i>Adamts10</i>      | 452.36          | 223.25                                   | -2.03                                             | 0.0043571                                             |
| <i>Otud1</i>         | 292.70          | 144.89                                   | -2.02                                             | 0.0000232                                             |
| <i>Tnfsf10</i>       | 519.72          | 258.72                                   | -2.01                                             | 0.0012965                                             |
| <i>Dad1</i>          | 1040.71         | 518.59                                   | -2.01                                             | 0.0005191                                             |
| <i>Slc25a38</i>      | 393.85          | 196.41                                   | -2.01                                             | 0.0012226                                             |
| <i>Rorc</i>          | 206.50          | 103.16                                   | -2.00                                             | 0.0002276                                             |
| <i>1110002B05Rik</i> | 792.39          | 1589.13                                  | 2.01                                              | 0.0184379                                             |
| <i>Rps3a</i>         | 2281.02         | 4591.84                                  | 2.01                                              | 0.0015101                                             |
| <i>Pttg1</i>         | 205.19          | 413.76                                   | 2.02                                              | 0.0002329                                             |
| <i>Cdkn1b</i>        | 292.66          | 591.26                                   | 2.02                                              | 0.0304524                                             |
| <i>BC002163</i>      | 156.48          | 318.13                                   | 2.03                                              | 0.0016174                                             |
| <i>Akap6</i>         | 189.94          | 387.76                                   | 2.04                                              | 0.0001164                                             |
| <i>AI747699</i>      | 162.62          | 334.80                                   | 2.06                                              | 0.0025647                                             |
| <i>Gm10785</i>       | 67.18           | 139.14                                   | 2.07                                              | 0.0033010                                             |
| <i>Mpp6</i>          | 281.16          | 585.54                                   | 2.08                                              | 0.0000206                                             |
| <i>Gm7239</i>        | 141.52          | 296.50                                   | 2.10                                              | 0.0394281                                             |
| <i>Gm13194</i>       | 68.68           | 145.16                                   | 2.11                                              | 0.0025320                                             |
| <i>Rpl35a</i>        | 1196.90         | 2554.14                                  | 2.13                                              | 0.0024201                                             |
| <i>Hectd2</i>        | 112.45          | 242.97                                   | 2.16                                              | 0.0330727                                             |
| <i>St8sia1</i>       | 222.18          | 482.05                                   | 2.17                                              | 0.0001005                                             |
| <i>Gm9197</i>        | 994.12          | 2202.35                                  | 2.22                                              | 0.0001031                                             |
| <i>Impdh2</i>        | 294.13          | 652.69                                   | 2.22                                              | 0.0000299                                             |
| <i>2010016I18Rik</i> | 118.21          | 263.02                                   | 2.23                                              | 0.0112077                                             |

| <b>Name</b>          | <b>MatV6.WT</b> | <b>Total V6.<i>Itk</i><sup>-/-</sup></b> | <b>FC Total V6.<i>Itk</i><sup>-/-</sup>/MatV6</b> | <b>t-test Total V6.<i>Itk</i><sup>-/-</sup>/MatV6</b> |
|----------------------|-----------------|------------------------------------------|---------------------------------------------------|-------------------------------------------------------|
| <i>Gm7693</i>        | 62.91           | 141.15                                   | 2.24                                              | 0.0059760                                             |
| <i>Rnf7</i>          | 103.18          | 232.59                                   | 2.25                                              | 0.0192755                                             |
| <i>Gm8936</i>        | 206.21          | 465.75                                   | 2.26                                              | 0.0152089                                             |
| <i>Hist1h1b</i>      | 1318.93         | 3015.55                                  | 2.29                                              | 0.0117301                                             |
| <i>Gm6134</i>        | 331.75          | 758.86                                   | 2.29                                              | 0.0000140                                             |
| <i>Grm4</i>          | 53.33           | 123.55                                   | 2.32                                              | 0.0005304                                             |
| <i>BC005685</i>      | 407.02          | 945.25                                   | 2.32                                              | 0.0053203                                             |
| <i>Spc25</i>         | 160.39          | 374.62                                   | 2.34                                              | 0.0075292                                             |
| <i>Tex2</i>          | 427.33          | 999.45                                   | 2.34                                              | 0.0001571                                             |
| <i>Fam169b</i>       | 94.11           | 220.45                                   | 2.34                                              | 0.0000470                                             |
| <i>Robo1</i>         | 57.14           | 134.01                                   | 2.35                                              | 0.0007106                                             |
| <i>B930036N10Rik</i> | 210.75          | 500.86                                   | 2.38                                              | 0.0071539                                             |
| <i>Vegfa</i>         | 74.56           | 178.74                                   | 2.40                                              | 0.0057285                                             |
| <i>Rps19</i>         | 548.43          | 1319.58                                  | 2.41                                              | 0.0000366                                             |
| <i>Fam46c</i>        | 118.20          | 284.78                                   | 2.41                                              | 0.0013337                                             |
| <i>Plce1</i>         | 50.35           | 121.60                                   | 2.42                                              | 0.0011939                                             |
| <i>Sgk3</i>          | 246.65          | 607.50                                   | 2.46                                              | 0.0009173                                             |
| <i>D10Erttd322e</i>  | 57.58           | 143.80                                   | 2.50                                              | 0.0017007                                             |
| <i>Gm6983</i>        | 90.93           | 227.19                                   | 2.50                                              | 0.0045592                                             |
| <i>LOC641050</i>     | 250.49          | 626.57                                   | 2.50                                              | 0.0008188                                             |
| <i>Cox6a1</i>        | 552.67          | 1403.36                                  | 2.54                                              | 0.0000628                                             |
| <i>Utp3</i>          | 181.54          | 461.32                                   | 2.54                                              | 0.0000084                                             |
| <i>Hc</i>            | 69.27           | 176.93                                   | 2.55                                              | 0.0022111                                             |
| <i>Aldh2</i>         | 147.82          | 379.00                                   | 2.56                                              | 0.0016297                                             |
| <i>Ccr2</i>          | 521.37          | 1362.91                                  | 2.61                                              | 0.0008710                                             |
| <i>Smpdl3b</i>       | 54.67           | 143.30                                   | 2.62                                              | 0.0001684                                             |
| <i>Lrig1</i>         | 138.28          | 364.03                                   | 2.63                                              | 0.0000121                                             |
| <i>LOC625360</i>     | 150.83          | 398.74                                   | 2.64                                              | 0.0009480                                             |
| <i>Pde7b</i>         | 59.64           | 162.00                                   | 2.72                                              | 0.0007030                                             |
| <i>Trim36</i>        | 247.95          | 673.74                                   | 2.72                                              | 0.0000485                                             |
| <i>Tmie</i>          | 130.23          | 371.28                                   | 2.85                                              | 0.0000807                                             |
| <i>Themis</i>        | 162.95          | 467.02                                   | 2.87                                              | 0.0000768                                             |
| <i>Nrn1</i>          | 49.83           | 144.73                                   | 2.90                                              | 0.0143701                                             |
| <i>Atp8a2</i>        | 269.36          | 790.60                                   | 2.94                                              | 0.0025624                                             |
| <i>Adh1</i>          | 583.07          | 1767.54                                  | 3.03                                              | 0.0034993                                             |
| <i>Ass1</i>          | 510.21          | 1693.13                                  | 3.32                                              | 0.0025969                                             |
| <i>Gm12643</i>       | 346.02          | 1167.90                                  | 3.38                                              | 0.0028830                                             |
| <i>Rps6ka2</i>       | 86.03           | 291.21                                   | 3.38                                              | 0.0000609                                             |
| <i>Rpl22l1</i>       | 191.16          | 694.60                                   | 3.63                                              | 0.0032522                                             |
| <i>Gm10673</i>       | 84.39           | 315.49                                   | 3.74                                              | 0.0278930                                             |
| <i>Ctla2a</i>        | 109.64          | 413.21                                   | 3.77                                              | 0.0190028                                             |
| <i>Slc15a1</i>       | 109.04          | 425.47                                   | 3.90                                              | 0.0043181                                             |
| <i>Gadl1</i>         | 279.47          | 1170.05                                  | 4.19                                              | 0.0013129                                             |
| <i>Asns</i>          | 72.29           | 312.27                                   | 4.32                                              | 0.0008115                                             |
| <i>Atp6v0d2</i>      | 34.53           | 149.56                                   | 4.33                                              | 0.0073007                                             |
| <i>Fam84a</i>        | 68.19           | 313.77                                   | 4.60                                              | 0.0012338                                             |
| <i>Aqp9</i>          | 110.77          | 520.86                                   | 4.70                                              | 0.0004120                                             |
| <i>Cd4</i>           | 311.11          | 1624.03                                  | 5.22                                              | 0.0006427                                             |
| <i>Lztf1l</i>        | 356.46          | 1917.36                                  | 5.38                                              | 0.0000484                                             |
| <i>Ccr9</i>          | 379.30          | 2109.04                                  | 5.56                                              | 0.0000886                                             |
| <i>Gpnmb</i>         | 203.37          | 1236.47                                  | 6.08                                              | 0.0000103                                             |

| <b>Name</b>          | <b>MatV6.WT</b> | <b>Total V6.<i>Itk</i><sup>-/-</sup></b> | <b>FC Total V6.<i>Itk</i><sup>-/-</sup>/MatV6</b> | <b>t-test Total V6.<i>Itk</i><sup>-/-</sup>/MatV6</b> |
|----------------------|-----------------|------------------------------------------|---------------------------------------------------|-------------------------------------------------------|
| <i>Art2b</i>         | 347.96          | 2138.62                                  | 6.15                                              | 0.0000559                                             |
| <i>Tdgf1</i>         | 139.25          | 926.29                                   | 6.65                                              | 0.0001251                                             |
| <i>1810011H11Rik</i> | 104.81          | 863.26                                   | 8.24                                              | 0.0002451                                             |
