# Supplementary material
Source: PubMed Central journal article supplement (PMC3594397)
Supplement: NIHMS435206-supplement-3.pdf [file NIHMS435206-supplement-3.pdf]

### Supplemental Table 2: *Itk*<sup>-/-</sup> V6 thymocytes are similar to early stage NKT cells.

List of the 51 genes identified in Figure 5C that were decreased in *Itk*<sup>-/-</sup> V6 thymocytes versus WT CD24<sup>lo</sup> V6 cells and increased in NKT.44<sup>+</sup>NK1.1<sup>+</sup> cells versus MatCD4 and MatCD8 single positive thymocytes. Nomenclature is according to immgen.org: MatV6.WT= CD24(HSA)<sup>lo</sup> V6  $\gamma\delta$  T cells from adult WT thymus; TotalV6.*Itk*<sup>-/-</sup>, total V6  $\gamma\delta$  T cells from adult *Itk*<sup>-/-</sup> thymus, which are 95-98% CD24<sup>lo</sup>; NKT.44<sup>+</sup>NK1.1<sup>+</sup>, CD44<sup>+</sup>NK1.1<sup>+</sup> thymic iNKT cells; NKT.44<sup>-</sup>NK1.1<sup>-</sup>, CD44<sup>-</sup>NK1.1<sup>-</sup> thymic iNKT cells; MatCD4, CD24<sup>lo</sup> CD4<sup>+</sup> $\delta$ <sup>-</sup> thymocytes; MatCD8, CD24<sup>lo</sup> CD4<sup>-</sup> $\delta$ <sup>+</sup> thymocytes. For each gene, the MEV in each population is shown, along with the fold change (FC, ratio of MEVs) and *t*-test P-values for select populations. Fractional FC values indicative of decreased expression were converted to whole numbers (-1/FC). Table was sorted by the FC in NKT.44<sup>+</sup>NK1.1<sup>+</sup> vs. NKT.44<sup>-</sup>NK1.1<sup>-</sup> in descending order. Increased FCs are in red, and decreased FC are in blue. Only those FC that had an accompanying *t*-test P-value<0.05 were color coded.

| Name             | NKT.44 <sup>+</sup><br>NK1.1 <sup>-</sup> | NKT.44 <sup>-</sup><br>NK1.1 <sup>-</sup> | Total<br>V6. <i>Itk</i> <sup>-/-</sup> | MatCD4 | ImmV6.WT | NKT.44 <sup>+</sup><br>NK1.1 <sup>+</sup> | MatV6.WT | FC<br>NKT.44 <sup>+</sup> NK1.1 <sup>+</sup> /<br>NKT.44 <sup>-</sup> NK1.1 <sup>-</sup> | FC<br>MatV6.WT/<br>Total V6. <i>Itk</i> <sup>-/-</sup> |
|------------------|-------------------------------------------|-------------------------------------------|----------------------------------------|--------|----------|-------------------------------------------|----------|------------------------------------------------------------------------------------------|--------------------------------------------------------|
| <i>Gzmb</i>      | 263.52                                    | 59.63                                     | 55.90                                  | 35.89  | 53.79    | 3690.25                                   | 633.86   | 62.50                                                                                    | -11.34                                                 |
| <i>Klra9</i>     | 183.62                                    | 36.80                                     | 116.40                                 | 14.88  | 20.31    | 2048.93                                   | 427.69   | 55.56                                                                                    | -3.67                                                  |
| <i>Klra10</i>    | 186.67                                    | 29.15                                     | 124.98                                 | 11.28  | 19.54    | 1327.23                                   | 433.45   | 45.45                                                                                    | -3.47                                                  |
| <i>Klra5</i>     | 101.50                                    | 44.49                                     | 11.54                                  | 9.61   | 12.89    | 1711.04                                   | 606.58   | 38.46                                                                                    | -52.56                                                 |
| <i>Styk1</i>     | 111.64                                    | 45.74                                     | 61.21                                  | 45.24  | 47.87    | 1697.79                                   | 274.89   | 37.04                                                                                    | -4.49                                                  |
| <i>Klrc1</i>     | 130.69                                    | 44.84                                     | 28.56                                  | 20.23  | 31.17    | 1424.19                                   | 575.27   | 32.26                                                                                    | -20.14                                                 |
| <i>Itga1</i>     | 51.89                                     | 25.94                                     | 27.91                                  | 24.79  | 21.61    | 591.77                                    | 191.72   | 22.73                                                                                    | -6.87                                                  |
| <i>Klra6</i>     | 90.35                                     | 34.96                                     | 25.40                                  | 16.39  | 23.13    | 619.46                                    | 252.79   | 17.86                                                                                    | -9.95                                                  |
| <i>Xcl1</i>      | 176.18                                    | 77.30                                     | 77.05                                  | 55.18  | 166.14   | 1303.42                                   | 406.83   | 16.95                                                                                    | -5.28                                                  |
| <i>Fasl</i>      | 184.63                                    | 66.38                                     | 63.37                                  | 55.58  | 46.53    | 1008.42                                   | 178.06   | 15.15                                                                                    | -4.93                                                  |
| <i>Slamf7</i>    | 192.86                                    | 87.09                                     | 72.42                                  | 37.99  | 84.65    | 1309.85                                   | 356.80   | 15.15                                                                                    | -2.81                                                  |
| <i>Klrc2</i>     | 87.01                                     | 70.41                                     | 31.90                                  | 20.25  | 29.30    | 949.16                                    | 314.20   | 13.51                                                                                    | -9.85                                                  |
| <i>Klrd1</i>     | 217.81                                    | 78.10                                     | 82.92                                  | 22.27  | 56.34    | 961.66                                    | 631.61   | 12.35                                                                                    | -7.62                                                  |
| <i>Myo1f</i>     | 563.94                                    | 161.47                                    | 143.31                                 | 78.90  | 276.54   | 1852.20                                   | 713.09   | 11.49                                                                                    | -4.98                                                  |
| <i>Klrk1</i>     | 121.80                                    | 87.51                                     | 66.83                                  | 19.13  | 23.52    | 966.89                                    | 457.32   | 10.99                                                                                    | -6.84                                                  |
| <i>Fcer1g</i>    | 101.12                                    | 105.67                                    | 76.45                                  | 38.62  | 357.52   | 1035.02                                   | 757.52   | 9.80                                                                                     | -9.91                                                  |
| <i>Ccl5</i>      | 169.33                                    | 98.25                                     | 91.14                                  | 98.04  | 154.38   | 930.92                                    | 726.60   | 9.43                                                                                     | -7.97                                                  |
| <i>Dennd4a</i>   | 239.29                                    | 160.97                                    | 97.54                                  | 115.89 | 150.21   | 1431.71                                   | 311.74   | 8.93                                                                                     | -3.20                                                  |
| <i>Il10ra</i>    | 62.11                                     | 52.75                                     | 48.55                                  | 141.87 | 363.33   | 446.93                                    | 130.51   | 8.47                                                                                     | -2.69                                                  |
| <i>Klrb1f</i>    | 130.38                                    | 41.67                                     | 62.47                                  | 29.22  | 46.70    | 292.94                                    | 421.95   | 7.04                                                                                     | -6.75                                                  |
| <i>Ly6c2</i>     | 782.17                                    | 260.58                                    | 435.77                                 | 234.46 | 172.49   | 1711.63                                   | 1082.55  | 6.58                                                                                     | -2.48                                                  |
| <i>Samd3</i>     | 277.45                                    | 99.95                                     | 110.31                                 | 32.64  | 34.21    | 640.24                                    | 269.60   | 6.41                                                                                     | -2.44                                                  |
| <i>Crim1</i>     | 268.01                                    | 195.00                                    | 183.74                                 | 457.31 | 276.51   | 1229.05                                   | 411.38   | 6.29                                                                                     | -2.24                                                  |
| <i>Ifngr1</i>    | 711.05                                    | 482.87                                    | 343.46                                 | 813.36 | 909.23   | 2998.52                                   | 757.30   | 6.21                                                                                     | -2.20                                                  |
| <i>Klrb1b</i>    | 115.96                                    | 42.22                                     | 43.26                                  | 30.15  | 30.45    | 253.19                                    | 170.35   | 5.99                                                                                     | -3.94                                                  |
| <i>Cd244</i>     | 53.62                                     | 56.66                                     | 38.81                                  | 44.51  | 82.91    | 336.02                                    | 262.96   | 5.92                                                                                     | -6.78                                                  |
| <i>Sulf2</i>     | 69.77                                     | 75.00                                     | 51.77                                  | 52.67  | 70.43    | 432.60                                    | 229.41   | 5.78                                                                                     | -4.43                                                  |
| <i>Il18rap</i>   | 786.26                                    | 241.39                                    | 164.24                                 | 47.52  | 54.57    | 1357.44                                   | 617.53   | 5.62                                                                                     | -3.76                                                  |
| <i>Tbx21</i>     | 575.14                                    | 335.66                                    | 197.80                                 | 69.89  | 99.37    | 1877.19                                   | 494.19   | 5.59                                                                                     | -2.50                                                  |
| <i>Arl4d</i>     | 220.58                                    | 133.31                                    | 94.09                                  | 62.78  | 62.30    | 691.39                                    | 274.38   | 5.18                                                                                     | -2.92                                                  |
| <i>Cd7</i>       | 1280.02                                   | 774.48                                    | 477.23                                 | 783.08 | 817.55   | 3825.89                                   | 1718.07  | 4.95                                                                                     | -3.60                                                  |
| <i>Serpina3f</i> | 52.08                                     | 40.76                                     | 37.75                                  | 32.14  | 41.72    | 175.78                                    | 129.97   | 4.31                                                                                     | -3.44                                                  |

|                      |         |         |        |        |         |         |         |       |       |
|----------------------|---------|---------|--------|--------|---------|---------|---------|-------|-------|
| <i>Il2rb</i>         | 1723.56 | 1284.87 | 727.38 | 684.43 | 2299.61 | 4968.56 | 2382.43 | 3.86  | -3.28 |
| <i>A430084P05Rik</i> | 71.78   | 51.08   | 45.95  | 35.62  | 63.50   | 167.25  | 168.29  | 3.28  | -3.66 |
| <i>Ahr</i>           | 328.16  | 182.64  | 103.61 | 104.19 | 923.03  | 592.53  | 332.79  | 3.25  | -3.21 |
| <i>Lpar6</i>         | 1060.02 | 553.08  | 427.59 | 740.23 | 887.38  | 1786.63 | 1178.25 | 3.23  | -2.76 |
| <i>H2-Q6</i>         | 740.39  | 885.13  | 655.29 | 427.18 | 376.41  | 2510.40 | 1405.72 | 2.83  | -2.15 |
| <i>Lyn</i>           | 93.49   | 86.44   | 79.74  | 43.15  | 238.16  | 228.27  | 223.84  | 2.64  | -2.81 |
| <i>Spry2</i>         | 313.62  | 296.88  | 381.82 | 57.65  | 572.98  | 775.98  | 845.57  | 2.61  | -2.21 |
| <i>Trf</i>           | 260.06  | 220.26  | 218.57 | 68.80  | 215.24  | 562.94  | 510.17  | 2.56  | -2.33 |
| <i>Srgap3</i>        | 108.10  | 75.43   | 56.99  | 45.39  | 128.21  | 188.20  | 144.14  | 2.49  | -2.53 |
| <i>Cysltr2</i>       | 145.21  | 67.45   | 58.38  | 16.35  | 82.75   | 163.27  | 138.97  | 2.42  | -2.38 |
| <i>Tnfsf10</i>       | 221.19  | 210.02  | 258.72 | 126.64 | 384.06  | 442.01  | 519.72  | 2.11  | -2.01 |
| <i>Arap3</i>         | 176.37  | 187.67  | 189.63 | 88.27  | 190.49  | 383.85  | 439.53  | 2.04  | -2.32 |
| <i>Lat2</i>          | 64.84   | 65.44   | 61.24  | 48.83  | 237.97  | 125.49  | 187.27  | 1.92  | -3.06 |
| <i>Cpne7</i>         | 101.71  | 76.28   | 95.91  | 68.70  | 65.72   | 140.51  | 285.40  | 1.84  | -2.98 |
| <i>F2r</i>           | 959.80  | 550.47  | 429.83 | 150.66 | 214.43  | 908.59  | 1152.13 | 1.65  | -2.68 |
| <i>Ehd4</i>          | 204.87  | 147.56  | 126.90 | 77.87  | 282.90  | 221.90  | 266.80  | 1.50  | -2.10 |
| <i>Maf</i>           | 520.84  | 421.32  | 375.64 | 134.46 | 174.88  | 469.98  | 795.65  | 1.12  | -2.12 |
| <i>Tirap</i>         | 182.08  | 147.07  | 193.28 | 50.91  | 67.98   | 124.10  | 402.75  | -1.19 | -2.08 |
| <i>Blk</i>           | 635.73  | 504.69  | 129.00 | 65.88  | 297.87  | 163.01  | 981.73  | -3.13 | -7.61 |
