# Supplementary material
Source: PubMed Central journal article supplement (PMC3594397)
Supplement: NIHMS435206-supplement-4.pdf [file NIHMS435206-supplement-4.pdf]

**A**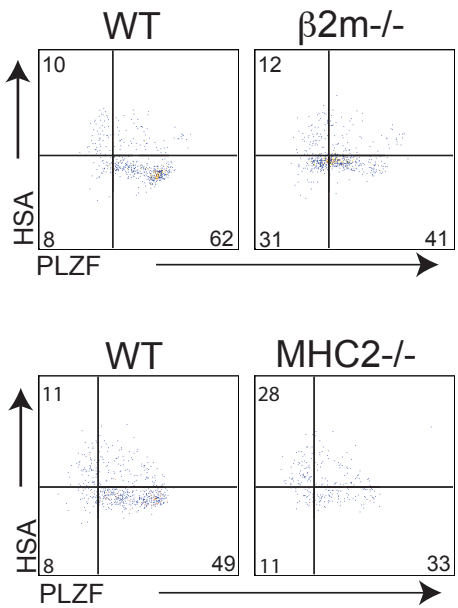**B**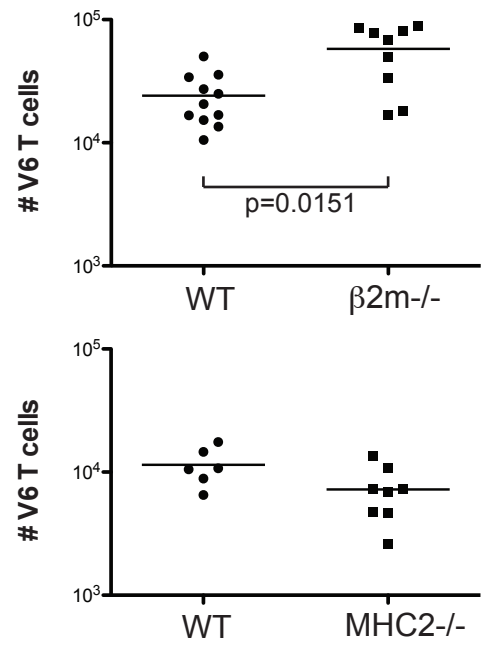

Supplemental Figure 2. Neither  $\beta 2m$ -dependent MHC class I molecules nor MHC class II molecules are not required for the development of V6 cells. (A) Thymocytes from WT,  $\beta 2m^{-/-}$  and MHC2<sup>-/-</sup> V6 cells were examined for HSA versus PLZF expression. Dot-plots show representative data. (B) Graphs show a compilation of total thymic V6 cells in WT,  $\beta 2m^{-/-}$  and MHC2<sup>-/-</sup> mice. Statistically significant differences are shown with p values. Data are representative of at least 2 independent experiments.
